# Supplementary material for: Gulf Stream and interior western boundary volume transport as key regions to constrain the future North Atlantic Carbon Uptake
Source: Copernicus journal article supplement (doi:10.5194/gmd-2022-152), 2022-06-07
Supplement: Supplementary file 1 [file gmd-2022-152-supplement.pdf]

# **Supplement of 'Gulf Stream and interior western boundary volume transport as key regions to constrain the future North Atlantic Carbon Uptake'**

Nadine Goris<sup>1</sup>, Klaus Johannsen<sup>2</sup>, and Jerry Tjiputra<sup>1</sup>

<sup>1</sup>NORCE Norwegian Research Centre and Bjerknes Centre for Climate Research, Bergen, Norway

<sup>2</sup>NORCE Norwegian Research Centre, Bergen, Norway

**Correspondence:** Nadine Goris (nadine.goris@norce-research.no)

# Multi-model mean, $C_{ant^*}$ -fraction, 1997-2007

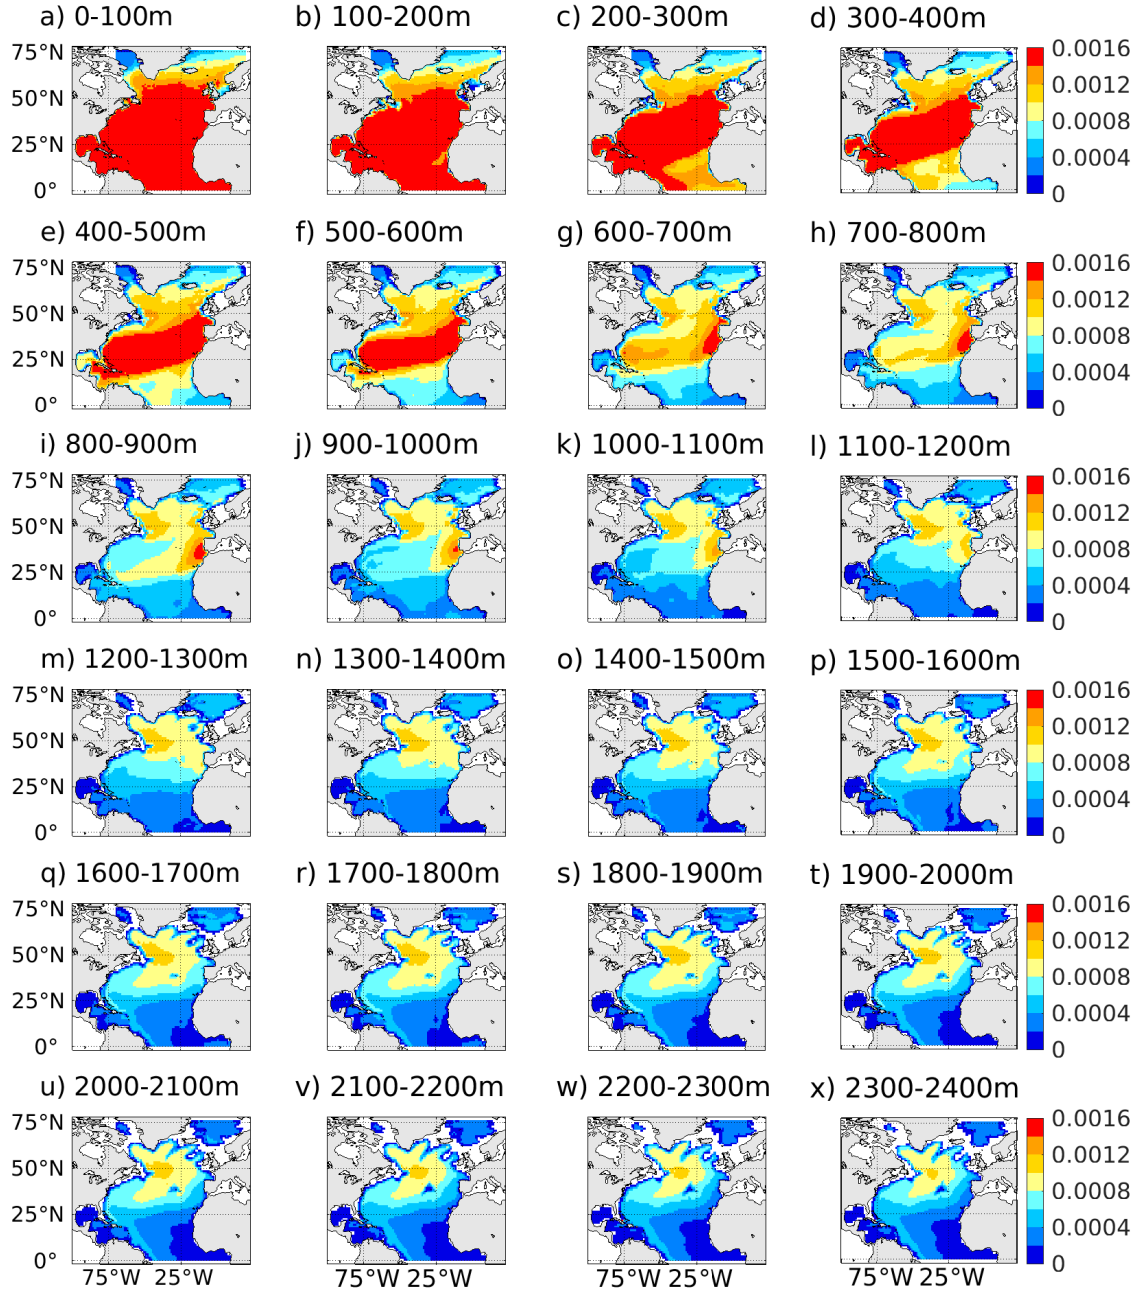

**Figure 1.** Contemporary fraction of the North Atlantic  $C_{ant^*}$  multi-model mean for our considered model-ensemble. Panels (a-x) displays results for different depth planes between surface and 2400m.

# Multi-model mean, $C_{ant^*}$ -fraction, 1997-2007

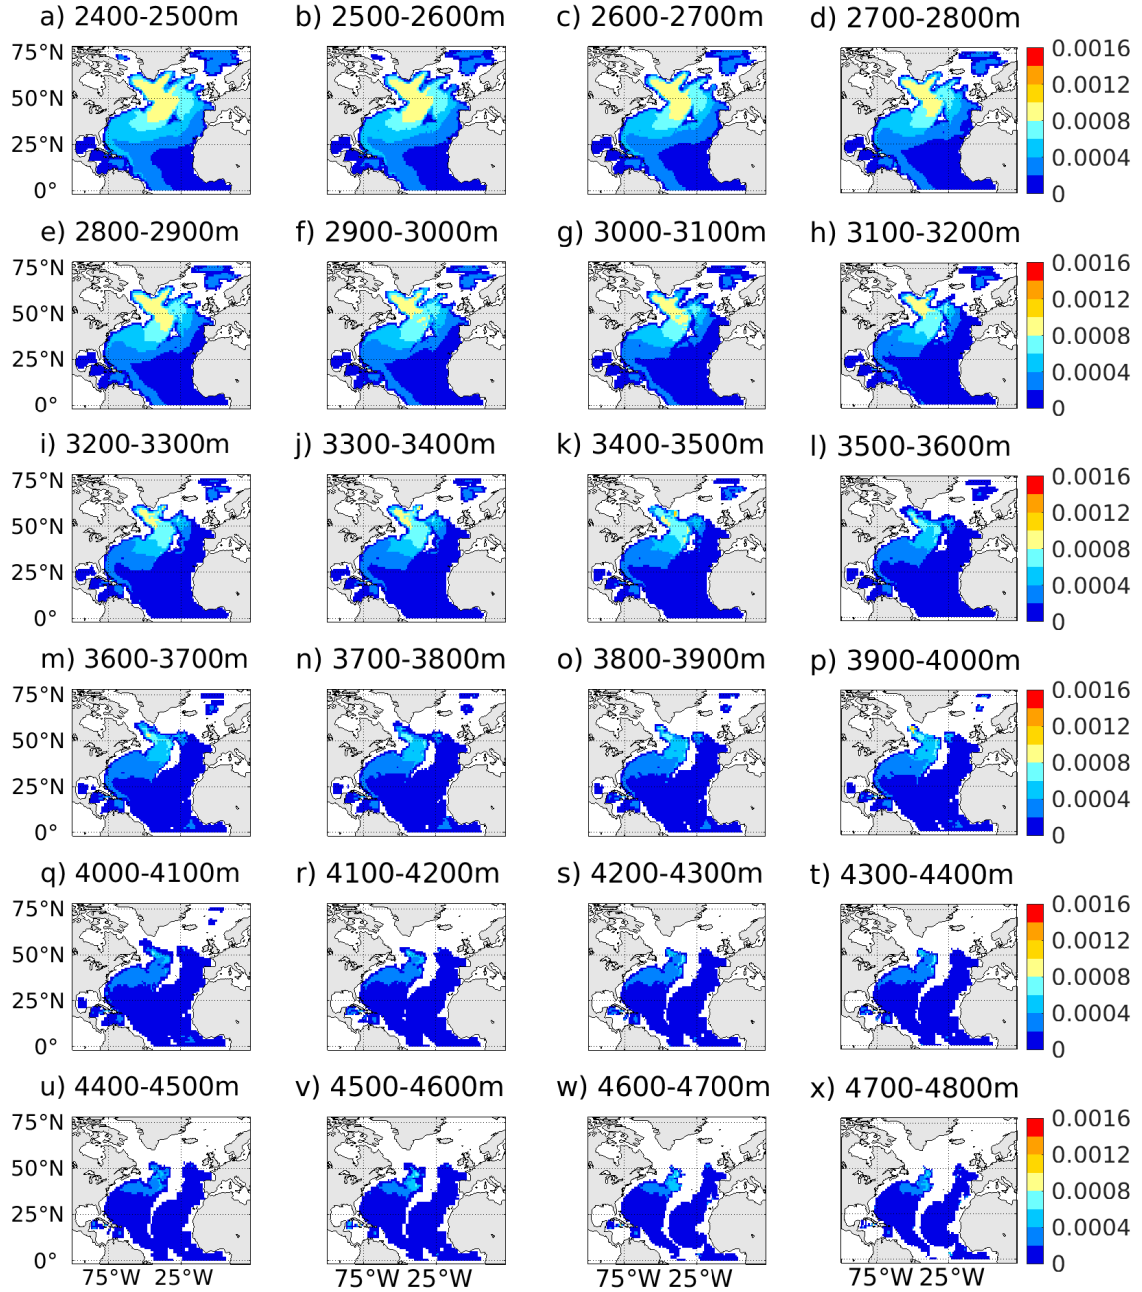

**Figure 2.** Contemporary fraction of the North Atlantic  $C_{ant^*}$  multi-model mean for our considered model-ensemble. Panels (a-x) displays results for different depth planes between 2400m and 4800m.

### Multi-model standard deviation, $C_{ant*}$ -fraction, 1997-2007

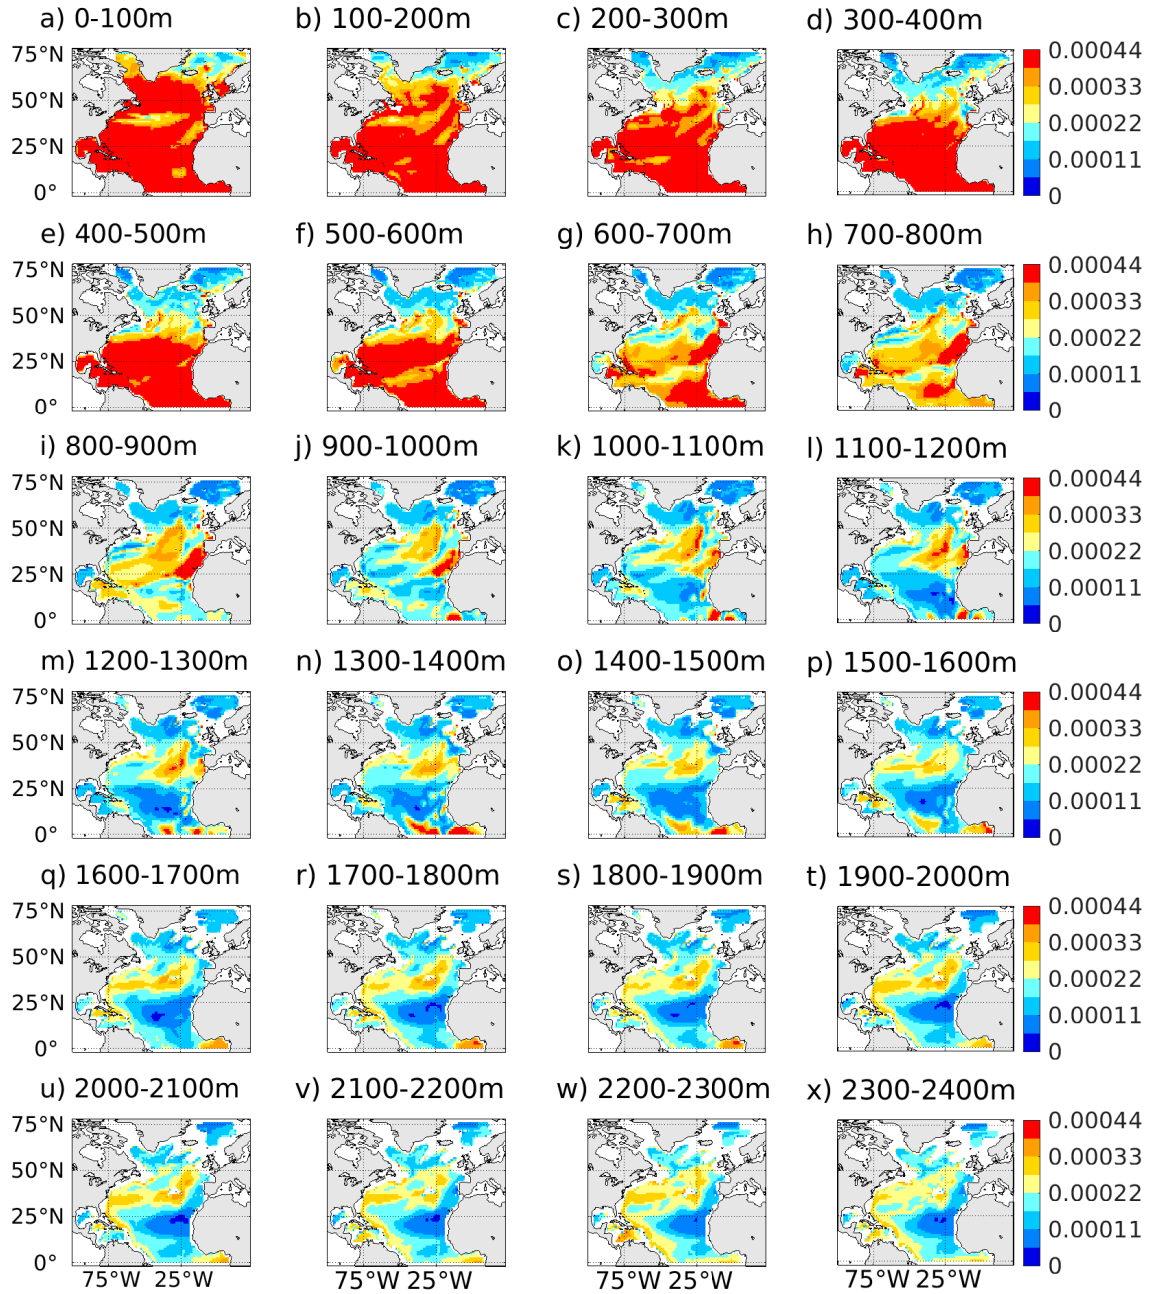

**Figure 3.** Contemporary fraction of the North Atlantic  $C_{ant*}$  multi-model standard deviation for our considered model-ensemble. Panels (a-x) displays results for different depth planes between surface and 2400m.

### Multi-model standard deviation, $C_{ant*}$ -fraction, 1997-2007

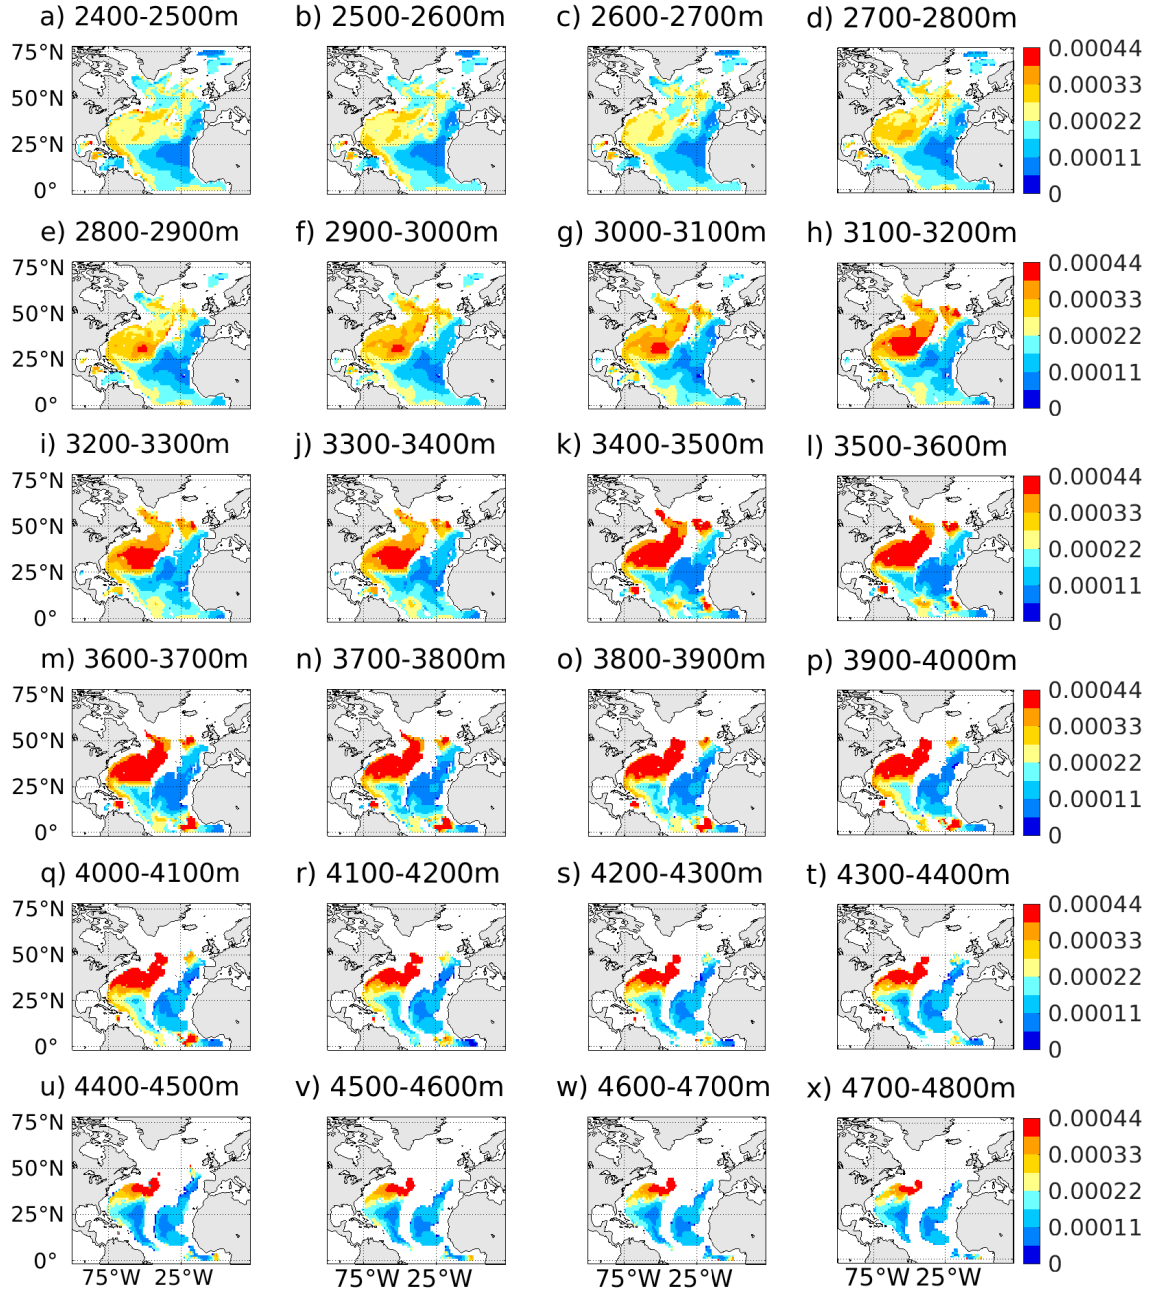

**Figure 4.** Contemporary fraction of the North Atlantic  $C_{ant*}$  multi-model standard deviation for our considered model-ensemble. Panels (a-x) displays results for different depth planes between 2400m and 4800m.
